# Supplementary material
Source: publisher figshare collection journal article supplement (https://rs.figshare.com/ndownloader/files/23098190)
Supplement: Supplementary file [file 23098190]

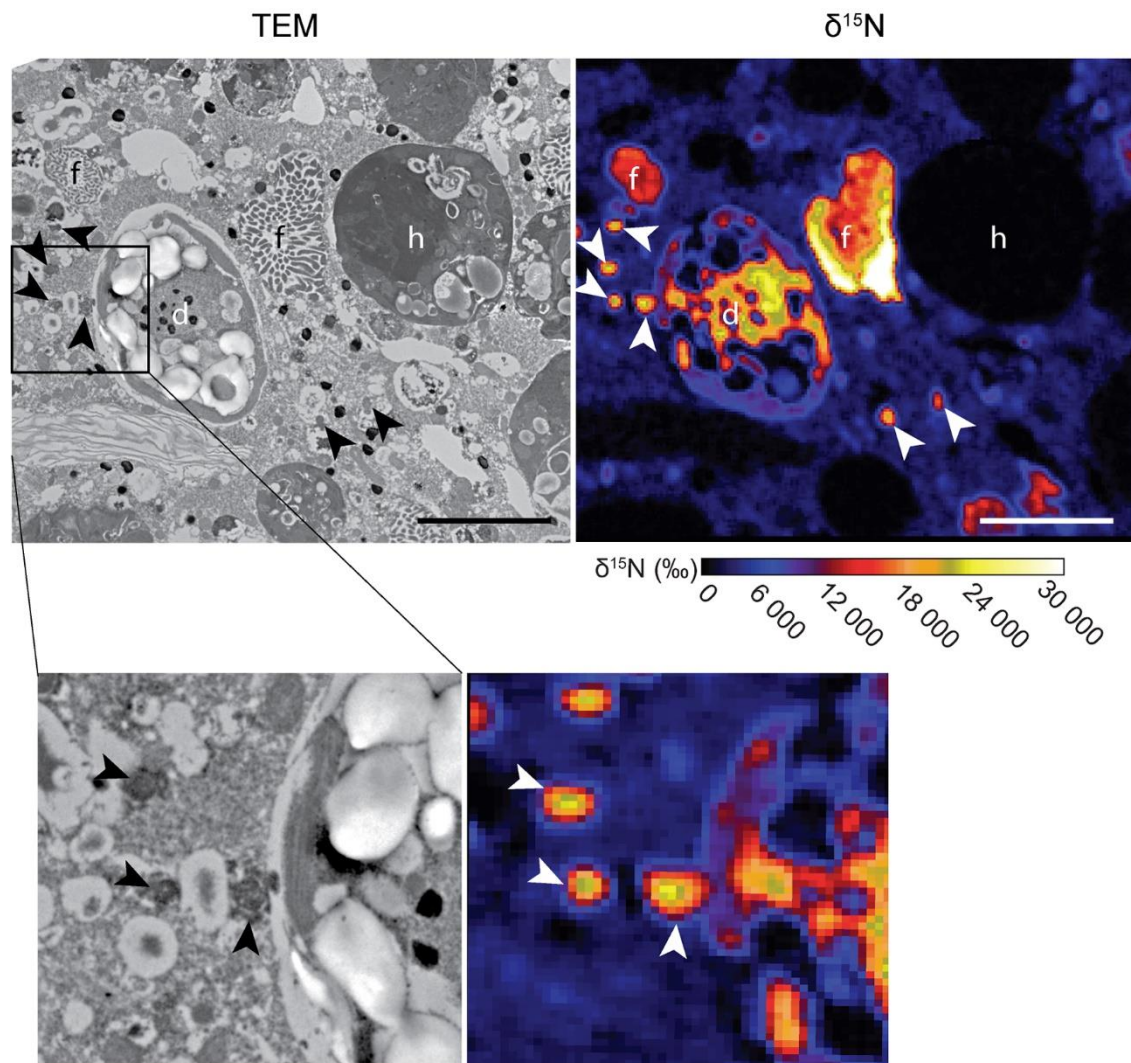

**Figure S4:** Highly enriched  $^{15}\text{N}$ -labeled vesicles in the foraminifer endoplasm at the periphery of the dinoflagellate. High magnification image of boxed region in Figure 2 that shows regions of elevated  $^{15}\text{N}$  accumulation at the end of the light phase ( $t = 6$  h). The  $^{15}\text{N}$  enriched regions correspond to sections of the dinoflagellate nucleus and chloroplast, and an *Orbulina universa* fibrillar body where extensive protein and nucleotide synthesis occurred during the light phase. Arrowheads:  $^{15}\text{N}$ -enriched vesicles, d: dinoflagellate, f: fibrillar body, h: large heterogeneous vesicle. Scale bars: 5  $\mu\text{m}$ .
